# Supplementary material for: Effects of Ginkgo biloba on Early Decompression after Spinal Cord Injury
Source: Hindawi journal article supplement (doi:10.1155/2020/6958246), 2020-01-01

Graphical Abstract:

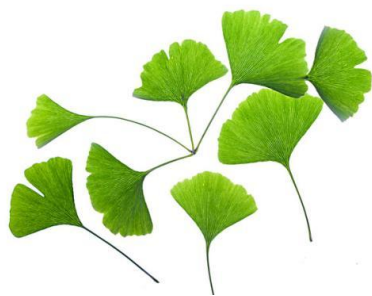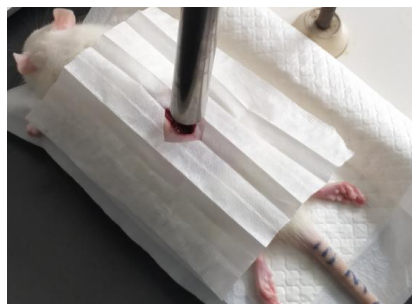

Supplement: f1 [file 6958246.f1.pdf]
